# Supplementary material for: Omics profiles used to evaluate the gene expression of Exiguobacterium antarcticum B7 during cold adaptation
Source: PubMed Central journal article supplement (PMC4247613; doi:10.1186/1471-2164-15-986), 2014-11-18
Supplement: 12864_2014_6691_MOESM4_ESM.pdf [file 12864_2014_6691_MOESM4_ESM.pdf]

**Table S3**

| Gene ID   | Product                               | DNA Strand | SOLiD*<br>(R1-0 vs R1-37) |                |                      |                      | log2 FC | Ion Torrent<br>(R2,3-0 vs R2,3-37) |
|-----------|---------------------------------------|------------|---------------------------|----------------|----------------------|----------------------|---------|------------------------------------|
|           |                                       |            | R1-0 reads                | R1-37 reads    | R1-0 RPKM            | R1-37 RPKM           |         | log2 FC                            |
| Eab7_1546 | Cold shock protein Csp1               | +          | 40181<br>[0]              | 2678<br>[0]    | 18189.97<br>[0,00]   | 2962.30<br>[0,00]    | 2.61    | 1.94                               |
| Eab7_1547 | Cold shock protein Csp2               | +          | 103503<br>[38]            | 3471<br>[3]    | 46855.90<br>[17,56]  | 3839.49<br>[3,33]    | 3.6     | 2.16                               |
| Eab7_1548 | Cold shock protein Csp3               | +          | 40442<br>[0]              | 2634<br>[0]    | 18308.13<br>[0,00]   | 2913.63<br>[0,00]    | 2.65    | 2.30                               |
| Eab7_1549 | Cold shock protein Csp4               | +          | 30512<br>[0]              | 2073<br>[0]    | 13812.81<br>[0,00]   | 2293.07<br>[0,00]    | 2.59    | 2.46                               |
| Eab7_2272 | Cold shock protein Csp5               | -          | 893<br>[869]              | 2591<br>[2591] | 404.26<br>[401,50]   | 2866.06<br>[2876,37] | -2.8    | -1.06                              |
| Eab7_2747 | Cold-shock DNA-binding domain protein | -          | 5502<br>[5490]            | 8102<br>[8100] | 2490.76<br>[2536,55] | 8962.12<br>[8992,14] | -1.84   | -1.28                              |

\* The values of total reads and RPKM obtained from the SOLiD system, counting (above) or discarding (lower brackets) the multireads.

## Table S4

| Gene ID            | Product                                        | SOLiD               | Ion Torrent         |
|--------------------|------------------------------------------------|---------------------|---------------------|
|                    |                                                | (R1-0 vs R1-37)     | (R2,3-0 vs R2,3-37) |
|                    |                                                | log <sub>2</sub> FC | log <sub>2</sub> FC |
| Eab7_1703          | Hypothetical protein                           | 1.93                | 3.15                |
| <b><i>sigD</i></b> | <b>RNA polymerase sigma-D factor</b>           | 2.6                 | 2.14                |
| <i>cheD</i>        | Chemoreceptor glutamine deamidase CheD         | 2.88                | 3                   |
| <i>cheC</i>        | CheY-P phosphatase CheC                        | 2.7                 | 2.57                |
| <i>cheW</i>        | Chemotaxis protein CheW                        | 2.5                 | 2.7                 |
| <i>cheA</i>        | Chemotaxis protein CheA                        | 2.7                 | 3.2                 |
| <i>ylxH</i>        | ylxH protein                                   | 3                   | 3                   |
| <i>flhF</i>        | Flagellar biosynthesis protein flhF            | 2.46                | 3.8                 |
| <i>flhA</i>        | Flagellar biosynthesis protein flhA            | 2.5                 | 2.72                |
| <i>flhB</i>        | Flagellar biosynthetic protein flhB            | 2                   | 3.32                |
| <i>fliR</i>        | Flagellar biosynthetic protein fliR            | 2.93                | 2                   |
| <i>fliQ</i>        | Flagellar biosynthetic protein FliQ            | 3.33                | 10.5                |
| <i>fliP</i>        | Flagellar biosynthetic protein fliP            | 2.67                | 2.32                |
| <i>fliZ</i>        | Flagellar biosynthetic protein fliZ            | 2                   | 2.27                |
| <i>cheY</i>        | Chemotaxis protein CheY                        | 2.52                | 5                   |
| <i>fliY</i>        | Flagellar motor switch phosphatase FliY        | 2.29                | 3.12                |
| <i>fliM</i>        | Flagellar motor switch protein FliM            | 2.25                | 2.11                |
| <i>fliL</i>        | Flagellar basal body-associated protein FliL   | 2                   | 2.94                |
| <i>flbD</i>        | Flagellar protein flbD                         | 2.33                | 2.67                |
| <i>flgG</i>        | Flagellar basal-body rod protein flgG          | 2.18                | 2.99                |
| <i>flgD</i>        | Flagellar hook capping protein                 | 2.2                 | 2.97                |
| <i>fliK</i>        | Flagellar hook-length control protein          | 2.69                | 2.96                |
| Eab7_1725          | MgtE intracellular region                      | 2.3                 | 2.19                |
| <i>fliJ</i>        | Flagellar biosynthesis chaperone FliJ          | 2.5                 | 2.42                |
| <i>fliI</i>        | Flagellum-specific ATP synthase                | 2                   | 2.5                 |
| <i>fliH</i>        | Flagellar assembly protein fliH                | 2.1                 | 2.52                |
| <i>fliG</i>        | Flagellar motor switch protein FliG            | 1.4                 | 2.35                |
| <i>fliF</i>        | Flagellar M-ring protein                       | 1.36                | 2                   |
| <i>fliE</i>        | Flagellar hook-basal body complex protein FliE | 0.98                | <u>0.74</u>         |
| <i>flgC</i>        | Flagellar basal-body rod protein flgC          | 1.63                | 1.77                |
| <i>flgB</i>        | Flagellar basal-body rod protein flgB          | 1.16                | 1.54                |

Log<sub>2</sub>FC underlined correspond to non-significant P-value (P-value>0.001).
